# Supplementary material for: Effects of Coronavirus Disease Pandemic on Tuberculosis Notifications, Malawi
Source: PubMed Central journal article supplement (PMC8237899; doi:10.3201/eid2707.210557), 2021-07
Supplement: 21-0557-Techapp-s1.pdf [file 21-0557-Techapp-s1.pdf]

# Effects of Coronavirus Disease Pandemic on Tuberculosis Notifications, Malawi

## Appendix

### Models

We used 2 models to estimate effects of coronavirus disease (COVID-19) on rates of tuberculosis (TB) case notifications in Blantyre, Malawi. One model estimates the effects of COVID-19 on TB case notifications, the other estimates differential effects of COVID-19 on TB case notifications by various factors.

#### Model 1

To estimate effects of COVID-19 on Blantyre TB case notification rates we used the following formula:

$$\log(\text{cases}) = \alpha + \beta_1(\text{covid}) + \beta_2(\text{month}) + \beta_3(\text{covid} \times \text{month.since.covid}) + \log(\text{population})$$

In this formula, cases are the expected numbers of notified TB cases per month,  $\alpha$  is the intercept, covid is the indicator variable for the period before or after introduction of COVID-19 restrictions (before or after April 1, 2020), month is the indicator for month from June 2016, month.since.covid is the number of months after April 1, 2020, and population is the monthly updated population denominator for Blantyre District.

#### Model 2

To estimate differential effects of COVID-19 on the number of TB cases notified by sex, HIV status, and whether TB was diagnosed at a primary care versus central hospital, we used the following formula:

$$\log(\text{cases}) = \alpha + \beta_1(\text{sex}_{\text{male}}) + \beta_2(\text{hiv}_{\text{positive}}) + \beta_3(\text{fac}_{\text{qech}}) + \sum_{ijk} \beta_{ijk}^{(0)}(\text{sex}_i \times \text{hiv}_j \times \text{fac}_k) \text{month} + \text{covid} \times \sum_{ijk} \beta_{ijk}^{(1)}(\text{sex}_i \times \text{hiv}_j \times \text{fac}_k) \text{month.since.covid}$$

In this formula,  $\text{cases}$  indicates the expected numbers of notified TB cases per month,  $\alpha$  is the intercept,  $\text{covid}$  is the indicator variable for the period before or after introduction of COVID-19 restrictions (before or after April 1, 2020),  $\text{month}$  is the indicator for month from June 2016,  $\text{month.since.covid}$  is the number of months after April 1, 2020,  $\text{sex}_i$  is the indicator for the sex of a person ( $i = \text{positive}$ ,  $\epsilon = \text{negative}$ ),  $\text{hiv}_j$  is the indicator for HIV status of person ( $j = \text{male}$ ,  $\epsilon = \text{female}$ ),  $\text{fac}_k$  is the indicator for the facility where TB was diagnosed ( $k = \text{hc}$ ,  $\epsilon = \text{qech}$ ] in which  $\text{hc}$  indicates a primary healthcare center and  $\text{qech}$  indicates Queen Elizabeth Central Hospital).
